# Supplementary material for: Rapid nitrogen transfer in the Sorghum bicolor-Glomus mosseae arbuscular mycorrhizal symbiosis: Glomus mosseae arbuscular mycorrhizal symbiosis
Source: PubMed Central journal article supplement — Plant Signal Behav. 2013 Jun 7;8(8):e25229. doi: 10.4161/psb.25229 (PMC4002587; doi:10.4161/psb.25229), 2013-06-07
Supplement: psb-8-e25229-s01.pdf [file psb-8-e25229-s01.pdf]

## **Supplemental Material to:**

**Sally Koegel, Thomas Boller, Moritz F. Lehmann, Andres  
Wiemken and Pierre-Emmanuel Courty**

**Rapid nitrogen transfer in the Sorghum bicolor—Glomus  
mosseae arbuscular mycorrhizal symbiosis**

**Plant Signaling & Behavior 2013; 8(8)**

**<http://dx.doi.org/10.4161/psb.25229>**

**[www.landesbioscience.com/journals/psb/article/25229](http://www.landesbioscience.com/journals/psb/article/25229)**

**Table 1: Percentage of <sup>15</sup>N of total N in plant and AM fungal mycelium.**

Values are the means of four replicates. Differences in relative gene expression between the treatments were performed with a one-way ANOVA (Scheffe's F test). Different letters indicate significant differences between the harvesting time points within one treatment.

|     | Hyphae             |                   | Roots    |          | Green leaves |          | Wilted yellow leaves |          |
|-----|--------------------|-------------------|----------|----------|--------------|----------|----------------------|----------|
|     | Hyphal compartment | Plant compartment | -Myc     | +Myc     | -Myc         | +Myc     | -Myc                 | +Myc     |
| 0h  | 1.13 (a)           | 1.03 (a)          | 0.36 (a) | 0.37 (a) | 0.36 (a)     | 0.36 (a) | 0.37 (a)             | 0.37 (a) |
| 12h | 1.35 (a)           | 1.24 (a)          | 0.37 (a) | 0.35 (a) | 0.36 (a)     | 0.36 (a) | 0.37 (a)             | 0.37 (a) |
| 24h | 4.46 (b)           | 1.91 (ab)         | 0.36 (a) | 0.37 (a) | 0.36 (a)     | 0.36 (a) | 0.37 (a)             | 0.37 (a) |
| 48h | 8.15 (c)           | 2.97 (b)          | 0.37 (a) | 0.71 (b) | 0.36 (a)     | 1.39 (b) | 0.37 (a)             | 0.37 (a) |
| 72h | 9.94 (c)           | 4.75 (c)          | 0.36 (a) | 1.05 (c) | 0.36 (a)     | 1.77 (c) | 0.37 (a)             | 0.37 (a) |
